# Supplementary material for: Cost-Effectiveness of Treatment Wetlands for Nitrogen Removal in Tropical and Subtropical Australia
Source: MDPI journal article supplement (doi:10.3390/w13223309), 2021-11-22
Supplement: s1 [file s1]

## **SUPPLEMENTARY DATA**

### **Cost-effectiveness of treatment wetlands for nitrogen removal in tropical and subtropical Australia**

Kavehei, E<sup>1</sup>, S. Hasan<sup>1</sup>, C. Wegscheidl<sup>2</sup>, M. Griffiths<sup>3</sup>, J.C.R. Smart<sup>1,4</sup>,  
C. Bueno<sup>5</sup>, L. Owen<sup>6</sup>, K. Akrami<sup>7</sup>, M. Shepherd<sup>3</sup>, S. Lowe<sup>8</sup>, M.F. Adame<sup>1\*</sup>

Table S1. Considerations, limitations and uncertainties in nitrogen (N) load reduction estimations for treatment wetlands: constructed treatment wetlands (CW), vegetated drain (VD), and sewage treatment plant wetlands (STPW).

| Flow measurement                                                                                                                                                                                                                                                                                                                                                                               | N load reduction estimation                                                                                                                                                                                                                                                                                                                                                                                                                                                                                                                                                                                                                                                                                                                                                                                                          |
|------------------------------------------------------------------------------------------------------------------------------------------------------------------------------------------------------------------------------------------------------------------------------------------------------------------------------------------------------------------------------------------------|--------------------------------------------------------------------------------------------------------------------------------------------------------------------------------------------------------------------------------------------------------------------------------------------------------------------------------------------------------------------------------------------------------------------------------------------------------------------------------------------------------------------------------------------------------------------------------------------------------------------------------------------------------------------------------------------------------------------------------------------------------------------------------------------------------------------------------------|
| CW1                                                                                                                                                                                                                                                                                                                                                                                            |                                                                                                                                                                                                                                                                                                                                                                                                                                                                                                                                                                                                                                                                                                                                                                                                                                      |
| Groundwater flow measured in a dry and a wet season to provide dry season and wet season average flow volumes (m <sup>3</sup> /day),                                                                                                                                                                                                                                                           | <p>Difference in N concentration from inlet to outlet calculated for each monitoring event and averaged. Inlet concentration was the average of both groundwater and surface water inflow.</p> <p>Annual N load reduction estimation (<math>N_{red}</math>) calculated separately for wet season and dry season flow and N reduction:</p> $N_{red} = \frac{\Delta N Q}{1000} d$ <p>(where <math>\Delta N</math> = average N reduction from inlet to outlet (mg L<sup>-1</sup>),<br/> <math>Q</math> = average flow volume (m<sup>3</sup> d<sup>-1</sup>),<br/> <math>d</math> = number of days of inundation.<br/> Rainfall is used as a proxy for inundation (i.e. 129 days per year).<br/> Confidence: medium due to no surface water flow measurements. Samples collected during a range of wet season and dry season events.</p> |
| CW2                                                                                                                                                                                                                                                                                                                                                                                            |                                                                                                                                                                                                                                                                                                                                                                                                                                                                                                                                                                                                                                                                                                                                                                                                                                      |
| <p>Flow estimation based on four months monitoring of changes in water depth using electronic water level loggers, to calculate flow (m<sup>3</sup>/day) (February to June 2020, representing a range of flow conditions).</p> <p>Average flow during this period used as wet season flow and minimum flow used as dry season flow for calculating flow outside of this monitoring period.</p> | <p>Difference in N concentration from inlet to outlet calculated for each monitoring event and averaged.</p> <p>Annual N load reduction estimation (<math>N_{red}</math>) calculated by adding together daily N reduction estimates:</p> $N_{red} = \sum \frac{\Delta N Q}{1000}$ <p>(where <math>\Delta N</math> = average N reduction from inlet to outlet (mg L<sup>-1</sup>),<br/> <math>Q</math> = average flow volume (m<sup>3</sup> d<sup>-1</sup>),<br/> Confidence: high, due to flow monitoring and samples collected across a range of wet season and dry season events.</p>                                                                                                                                                                                                                                              |
| CW3                                                                                                                                                                                                                                                                                                                                                                                            |                                                                                                                                                                                                                                                                                                                                                                                                                                                                                                                                                                                                                                                                                                                                                                                                                                      |

|                                                                                                                                                          |                                                                                                                                                                                                                                                                                                                                                                                                                                                                                                                                                                                                                                                                                                                                                                                                                                   |
|----------------------------------------------------------------------------------------------------------------------------------------------------------|-----------------------------------------------------------------------------------------------------------------------------------------------------------------------------------------------------------------------------------------------------------------------------------------------------------------------------------------------------------------------------------------------------------------------------------------------------------------------------------------------------------------------------------------------------------------------------------------------------------------------------------------------------------------------------------------------------------------------------------------------------------------------------------------------------------------------------------|
| No flow measurement.                                                                                                                                     | <p>Used areal denitrification rate calculated for this site (<math>6.3 \text{ mg m}^{-2} \text{ h}^{-1}</math>) as the DIN removal rate (as per Kavehei and others 2021).</p> <p>Annual N load reduction estimation (<math>N_{red}</math>) calculated using areal denitrification rate (converted to <math>\text{kg ha}^{-1} \text{ d}^{-1}</math>):</p> $N_{red} = D_t d$ <p>(Where <math>D_t</math> = areal denitrification,<br/> <math>d</math> = number of days of inundation)</p> <p>Rainfall is used as a proxy for inundation (i.e. 89 days of denitrification).</p> <p>Confidence: medium due to denitrification measurements quantifying rate of DIN removal. Likely to be an underestimate due to using rainfall as a proxy for inundation.</p>                                                                         |
| CW4                                                                                                                                                      |                                                                                                                                                                                                                                                                                                                                                                                                                                                                                                                                                                                                                                                                                                                                                                                                                                   |
| No flow measurement.                                                                                                                                     | <p>Used areal denitrification rate calculated for this site (<math>8.1 \text{ mg m}^{-2} \text{ h}^{-1}</math>) as the DIN removal rate (as per methodology in Kavehei and others 2021).</p> <p>Annual N load reduction estimation (<math>N_{red}</math>) calculated using areal denitrification rate (converted to <math>\text{kg ha}^{-1} \text{ d}^{-1}</math>)</p> $N_{red} = D_t d$ <p>(Where <math>D_t</math> = areal denitrification,<br/> <math>d</math> = number of days of inundation)</p> <p>Rainfall is used as a proxy for inundation (i.e. 129 days of denitrification).</p> <p>Confidence: medium, due to denitrification measurements quantifying rate of DIN removal. Uncertain if rainfall is a suitable proxy for this site due to configuration of inlet and outlet pipes controlling inflow and outflow.</p> |
| CW5                                                                                                                                                      |                                                                                                                                                                                                                                                                                                                                                                                                                                                                                                                                                                                                                                                                                                                                                                                                                                   |
| Water flows from the MUSIC hydrological model, based on catchment size and retention time (48h) and 10% of the size of wetland to the catchment (26 ha). | <p>Difference in N concentration from inlet to outlet calculated for each monitoring event and averaged.</p> <p>Annual N load reduction (<math>N_{red}</math>) estimated using :</p> $N_{red} = \Delta N \Delta Q$ <p>(where <math>\Delta N</math> = average N reduction from inlet to outlet (<math>\text{mg L}^{-1}</math>),<br/> <math>\Delta Q</math> = difference between flow in and flow out (<math>\text{ML/yr}</math>))</p>                                                                                                                                                                                                                                                                                                                                                                                              |

|                                                                                                                 |                                                                                                                                                                                                                                                                                                                                                                                                                                                                                                                                                                                                                                                                                                    |
|-----------------------------------------------------------------------------------------------------------------|----------------------------------------------------------------------------------------------------------------------------------------------------------------------------------------------------------------------------------------------------------------------------------------------------------------------------------------------------------------------------------------------------------------------------------------------------------------------------------------------------------------------------------------------------------------------------------------------------------------------------------------------------------------------------------------------------|
|                                                                                                                 | Confidence: Low, as water quality sampling was not undertaken during high rainfall events due to access constraints and were not representative of the hydrograph. Flow was not monitored.                                                                                                                                                                                                                                                                                                                                                                                                                                                                                                         |
| CW6                                                                                                             |                                                                                                                                                                                                                                                                                                                                                                                                                                                                                                                                                                                                                                                                                                    |
| Flow estimation based on changes in water depth to provide an estimate of volume treated (ML yr <sup>-1</sup> ) | <p>Difference in N concentration from inlet to outlet calculated for each monitoring event and averaged. Inlet concentration was the average of the two inlets.</p> <p>Annual N load reduction estimation (<math>N_{red}</math>) calculated using:</p> $N_{red} = \Delta N V$ <p>(where <math>\Delta N</math> = average N reduction from inlet to outlet (mg L<sup>-1</sup>),<br/> <math>V</math> = Total volume treated (ML/yr).</p> <p>Confidence: medium, as the sampling was timed well to capture up to the peak or full hydrograph for irrigation and rainfall events. Accurate flow measurements were not possible due to outlet structure design and re-use of water from the wetland.</p> |
| CW7                                                                                                             |                                                                                                                                                                                                                                                                                                                                                                                                                                                                                                                                                                                                                                                                                                    |
| No flow measurement.                                                                                            | <p>Used denitrification rate estimated for this site (791 µg L<sup>-1</sup> d<sup>-1</sup>) as the DIN removal rate (Waltham and Butler 2020).</p> <p>Annual N load reduction estimation (<math>N_{red}</math>) calculated using denitrification rate converted to kg ha<sup>-1</sup> d<sup>-1</sup></p> $N_{red} = D_t d$ <p>(Where <math>D_t</math> = denitrification rate,<br/> <math>d</math> = number of days of inundation)<br/> (88 kg ha<sup>-2</sup> yr<sup>-1</sup>)</p> <p>Confidence: low, as flow monitoring was not conducted and samples collected were not representative of the whole hydrograph.</p>                                                                             |
| CW8                                                                                                             |                                                                                                                                                                                                                                                                                                                                                                                                                                                                                                                                                                                                                                                                                                    |
| No flow measurement.                                                                                            | The lack of flow information for this site and limited sampling that was unlikely to be representative of different flow events and along the hydrograph, precludes an estimation of N load reduction.                                                                                                                                                                                                                                                                                                                                                                                                                                                                                             |

| VD1 and VD2                                                                                                             |                                                                                                                                                                                                                                                                                                                                                                                                                                                                                                                                                                                                                                                                                   |
|-------------------------------------------------------------------------------------------------------------------------|-----------------------------------------------------------------------------------------------------------------------------------------------------------------------------------------------------------------------------------------------------------------------------------------------------------------------------------------------------------------------------------------------------------------------------------------------------------------------------------------------------------------------------------------------------------------------------------------------------------------------------------------------------------------------------------|
| One week of flow discharge measurement..                                                                                | <p>Used areal denitrification rate calculated for the sites (1.8 and 9.1 mg m<sup>-2</sup> h<sup>-1</sup> respectively) as the DIN removal rate (as per methodology in Kavehei and others 2021).</p> <p>Annual N load reduction estimation (<math>N_{red}</math>) calculated using areal denitrification rate (converted to kg ha<sup>-1</sup> d<sup>-1</sup>)</p> $N_{red} = D_t d$ <p>(Where <math>D_t</math> = areal denitrification,<br/> <math>d</math> = number of days of inundation)<br/> Rainfall is used as a proxy for inundation (i.e. 89 days of denitrification).<br/> Confidence: medium, due to denitrification measurements quantifying rate of DIN removal.</p> |
| STPW1 and STPW2                                                                                                         |                                                                                                                                                                                                                                                                                                                                                                                                                                                                                                                                                                                                                                                                                   |
| Continuous flow discharge (in and outflow) measurements                                                                 | <p>Total daily N load at inlet and outlet calculated using water quality and flow monitoring.<br/> Annual N load reduction estimation (<math>N_{red}</math>) calculated using:</p> $N_{red} = \sum N_{in} - N_{out}$ <p>(where <math>N_{in}</math> = daily N inflow (kg),<br/> <math>N_{out}</math> = daily N outflow (kg),<br/> <math>V</math> = Total volume treated (ML/yr).<br/> Confidence: high, due to continuous flow monitoring and N monitoring.</p>                                                                                                                                                                                                                    |
| STPW3 and STPW4                                                                                                         |                                                                                                                                                                                                                                                                                                                                                                                                                                                                                                                                                                                                                                                                                   |
| Flow estimation based on average dry weather flow design capacity ((m <sup>3</sup> d <sup>-1</sup> ), 365 days a year). | <p>Calculated the average difference in N concentration from inlet to outlet.<br/> Annual N load reduction estimation (<math>N_{red}</math>) calculated using:</p> $N_{red} = \frac{\Delta N Q}{1000} d$ <p>(where <math>\Delta N</math> = average N reduction from inlet to outlet (mg L<sup>-1</sup>),<br/> <math>Q</math> = design flow volume (m<sup>3</sup> d<sup>-1</sup>)<br/> <math>d</math> = number of days of flow.<br/> Confidence: medium, due to using design flow capacity instead of monitoring flows.</p>                                                                                                                                                        |

Table S2. Summary of cost data categories provided by project proponents for inclusion in the cost-effectiveness analysis. A '✓' indicates data are available and a '✗' indicates data are not available. Project management costs were unavailable for STPW1, STPW2, STPW3 and STPW4 (shown as shaded cells in grey).

| Site               | Upfront costs |                                 |                           | On-going costs                    |
|--------------------|---------------|---------------------------------|---------------------------|-----------------------------------|
|                    | Design        | Project management <sup>a</sup> | Construction <sup>b</sup> | Maintenance & repair <sup>c</sup> |
| CW1                | ✓             |                                 | ✓                         | ✓                                 |
| CW2                | ✓             | ✗                               | ✓                         | ✓                                 |
| CW3                | ✓             | ✗                               | ✓                         | ✓                                 |
| CW4 <sup>d</sup>   | ✓             | ✓                               | ✓                         | ✓                                 |
| CW5                | ✓             | ✗                               | ✓                         | ✗                                 |
| CW6                | ✓             | ✓                               | ✓                         | ✓                                 |
| CW7                | ✓             | ✓                               | ✓                         | ✗                                 |
| CW8                | ✓             | ✓                               | ✓                         | ✗                                 |
| VD1 <sup>e</sup>   | ✓             | ✗                               | ✗                         | ✗                                 |
| VD2 <sup>e</sup>   | ✓             | ✗                               | ✗                         | ✗                                 |
| STPW1 <sup>f</sup> | ✗             | ✗                               | ✓                         | ✓                                 |
| STPW2              | ✓             | ✗                               | ✓                         | ✓                                 |
| STPW3              | ✓             | ✗                               | ✓                         | ✗                                 |
| STPW4              | ✓             | ✗                               | ✓                         | ✗                                 |

<sup>a</sup> For wetlands and drains on farms that have no project management cost, project management cost from CW6, scaled by area, is used instead. <sup>b</sup> Lump sum total upfront cost and construction costs were available for CW7 and CW8 but a breakdown between design cost and project management cost was not provided. <sup>c</sup> Maintenance cost from CW6, scaled by area, is used for CW5, CW7 and CW8; maintenance cost from STPW1, scaled by area, is used for STPW3 and STPW4. <sup>d</sup> Design cost for this wetland includes a specific cost component for a Development Approval for managing acid sulfate soil risk. <sup>e</sup> For VD1 and VD2, construction costs were estimated using an excavation cost function from Waltham et al 2021 (p85,86); maintenance cost was \$350 (in AUD expressed in financial year 2003/04 based on Waltham et al. 2021); and repair cost is assumed to be 20% of total construction cost. <sup>f</sup> Design cost for STP1 is assumed to be 15% of total wetland construction cost, consistent with industry practice.

Box S1: Adjusting base cost-effectiveness to include site-specific costs

The base cost-effectiveness reported in the paper can be readily adjusted to include site-specific costs to produce a 'revised' cost-effectiveness estimate appropriate for a wetland situated in a different location. This enables cost-effectiveness estimates to be derived for alternative scenarios and settings.

Base scenario (using 8.5ha treatment wetland CW3, 20-year evaluation period and 5% discount rate as an example)

- Annualised present value cost (APVC): \$4197 ha<sup>-1</sup> year<sup>-1</sup>
- DIN load removal: 135.17 kg year<sup>-1</sup>
- Cost-effectiveness at wetland site: \$31.05 kg<sup>-1</sup> DIN removed

Alternative scenario (i.e. base scenario *plus* three additional costs incurred in financial year 2020/21)

1. Development Approval *upfront* cost: \$40,000.
2. Opportunity cost i.e. forgone gross margin from cane which is an *on-going* cost: \$816 ha<sup>-1</sup> year<sup>-1</sup>
3. Pollutant (i.e. DIN) transport coefficient from wetland site to the Great Barrier Reef (GBR) lagoon: 0.9

All calculations that follow are based on an evaluation period of 20 years and a 5% discount rate. Other evaluation periods (15, 20 and 25 years) and/or discount rates (3%, 7%) can also be used (provided relevant APVC values from Table 5 are used in the base scenario).

Step 1: Annualise the per hectare upfront cost of Development Approval (DA) to convert it from \$/ha to \$/ha/year using Equation 2 (reproduced here as Equation A1):

$$APVC = \frac{\text{Total present value upfront cost}}{\left(\frac{1 - (1 + r)^{-T}}{r}\right)} \quad (S1)$$

Equation S1 indicates that: *Annualised PV cost* = *Total PV costs* ÷ *Annuity factor*, where the annuity factor for a 20-year evaluation period (T=20) and 5% discount rate (r = 0.05) is simply:

$$\text{Annuity Factor} = \frac{1 - (1 + r)^{-T}}{r} = \frac{1 - (1 + 0.05)^{-20}}{0.05} = 12.46221034 \quad (S2)$$

*Annualised upfront costs of Development Approval*

$$= \frac{\left(\frac{40,000}{8.5}\right)}{12.46221034} = 377.61 \quad (\text{in } \$/\text{ha}/\text{year}) \quad (\text{S3})$$

Step 2: Add the annualised upfront costs of development approval (\$377.61 ha<sup>-1</sup> year<sup>-1</sup>) and the on-going opportunity cost (\$816 ha<sup>-1</sup> year<sup>-1</sup>) to the APVC from the base scenario:

$$APVC_{\text{alternative\_scenario}} = 4197 + 377.61 + 816 = 5391.61 \quad (\text{in } \$/\text{ha}/\text{year}) \quad (\text{S4})$$

Step 3: Revised or predicted cost-effectiveness at wetland site is calculated using Equation 3 in the paper(reproduced here as Equation A5):

$$CE_{\text{at\_site}} = \frac{APVC}{DIN_{\text{removed}}_{\text{at\_site}}} = \frac{5391.61}{135.17} \approx 39.89 \quad (\text{in } \$/\text{kg}) \quad (\text{S5})$$

Step 4: Revised or predicted cost-effectiveness at end-of-catchment is

$$CE_{\text{end\_of\_catchment}} = \frac{CE_{\text{at\_site}}}{\text{Transport coefficient}} = \frac{39.89}{0.9} = 44.32 \quad (\text{in } \$/\text{kg}) \quad (\text{S6})$$



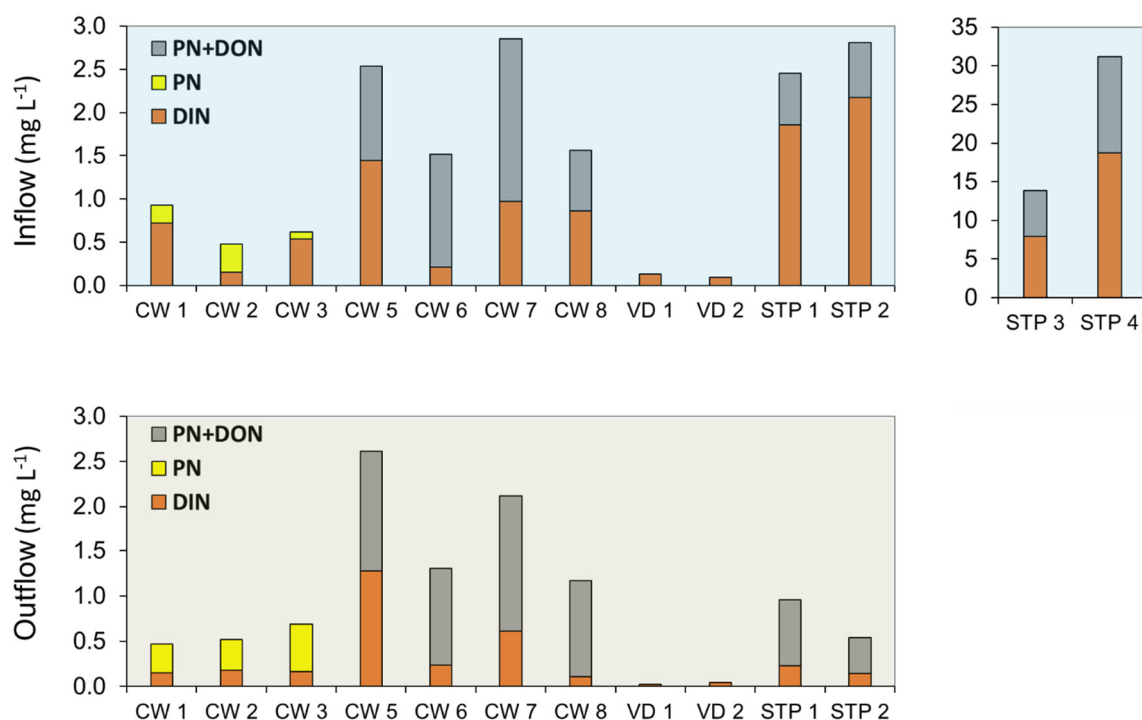

Figure S1. Inflow and outflow concentrations (mg L<sup>-1</sup>) and contribution to total nitrogen (TN) of the different species: particulate N (PN), dissolved organic N (PON) and dissolved inorganic N (DIN) for treatment wetlands. There were no DON measurements for CW1, CW2 and CW3. CW = constructed wetlands, VD = vegetated drains and STPW= sewage treatment plant wetlands.

|     | DIN |    |     |    |
|-----|-----|----|-----|----|
| DIN |     | TN |     |    |
| TN  | +   |    | TSS |    |
| TSS | -   |    |     | TP |
| TP  | +   | +  | +   |    |

**a) Inflow Concentrations**

|              | $\Delta$ DIN |             |              |             |
|--------------|--------------|-------------|--------------|-------------|
| $\Delta$ DIN |              | $\Delta$ TN |              |             |
| $\Delta$ TN  | +            |             | $\Delta$ TSS |             |
| $\Delta$ TSS | -            | -           |              | $\Delta$ TP |
| $\Delta$ TP  | +            | +           | +            |             |

**b) Removal**

Figure S2. Correlation ( $p < 0.01$ ) among inflow water parameters (DIN, TN, TSS and TP) and removal ( $\Delta$  mg L<sup>-1</sup>).

Table S3. Cost-effectiveness analysis under varying discount rates and evaluation periods for constructed treatment wetlands (CW) and vegetated drains (VD) in tropical Australia. APVC = annualised present value cost, CE = cost-effectiveness metric. Currency is in Australian Dollars (A\$)

| Treatment System ID | Discount rate: 3% per annum                   |                               |                                               |                                |                                               |                               |
|---------------------|-----------------------------------------------|-------------------------------|-----------------------------------------------|--------------------------------|-----------------------------------------------|-------------------------------|
|                     | 15 years                                      |                               | 20 years                                      |                                | 25 years                                      |                               |
|                     | APVC<br>A\$ yr <sup>-1</sup> ha <sup>-1</sup> | CE<br>A\$ kgDIN <sup>-1</sup> | APVC<br>A\$ yr <sup>-1</sup> ha <sup>-1</sup> | CE<br>A\$ kg DIN <sup>-1</sup> | APVC<br>A\$ yr <sup>-1</sup> ha <sup>-1</sup> | CE<br>A\$ kgDIN <sup>-1</sup> |
| CW1                 | 8,995                                         | 24                            | 7,345                                         | 20                             | 6,369                                         | 17                            |
| CW3                 | 4,429                                         | 33                            | 3,578                                         | 26                             | 3,075                                         | 23                            |
| CW4                 | 10,536                                        | 42                            | 8,863                                         | 35                             | 7,874                                         | 31                            |
| VD2                 | 3,887                                         | 50                            | 3,507                                         | 45                             | 3,167                                         | 41                            |
| CW7                 | 7,898                                         | 90                            | 6,564                                         | 75                             | 5,775                                         | 66                            |
| VD1                 | 5,753                                         | 102                           | 5,199                                         | 92                             | 4,676                                         | 83                            |
| CW6                 | 7,107                                         | 173                           | 5,929                                         | 144                            | 5,232                                         | 127                           |
| CW5                 | 7,124                                         | 651                           | 5,942                                         | 543                            | 5,244                                         | 479                           |
| CW2                 | 45,682                                        | 866                           | 36,825                                        | 698                            | 31,588                                        | 599                           |
|                     | Discount rate: 5% per annum                   |                               |                                               |                                |                                               |                               |
|                     | 15 years                                      |                               | 20 years                                      |                                | 25 years                                      |                               |
|                     | APVC<br>A\$ yr <sup>-1</sup> ha <sup>-1</sup> | CE<br>A\$ kgDIN <sup>-1</sup> | APVC<br>A\$ yr <sup>-1</sup> ha <sup>-1</sup> | CE<br>A\$ kg DIN <sup>-1</sup> | APVC<br>A\$ yr <sup>-1</sup> ha <sup>-1</sup> | CE<br>A\$ kgDIN <sup>-1</sup> |
| CW1                 | 10,106                                        | 27                            | 8,527                                         | 23                             | 7,616                                         | 21                            |
| W3                  | 5,014                                         | 37                            | 4,197                                         | 31                             | 3,725                                         | 28                            |
| CTW4                | 11,699                                        | 47                            | 10,096                                        | 40                             | 9,172                                         | 37                            |
| VD2                 | 4,224                                         | 54                            | 3,848                                         | 49                             | 3,540                                         | 45                            |
| CW7                 | 8,912                                         | 101                           | 7,614                                         | 87                             | 6,865                                         | 78                            |
| VD1                 | 6,256                                         | 111                           | 5,703                                         | 101                            | 5,233                                         | 93                            |
| CW6                 | 7,988                                         | 194                           | 6,844                                         | 166                            | 6,184                                         | 150                           |
| CW5                 | 7,898                                         | 722                           | 6,769                                         | 619                            | 6,118                                         | 559                           |
| CW2                 | 51,543                                        | 977                           | 43,084                                        | 816                            | 38,190                                        | 724                           |
|                     | Discount rate: 7% per annum                   |                               |                                               |                                |                                               |                               |
|                     | 15 years                                      |                               | 20 years                                      |                                | 25 years                                      |                               |
|                     | APVC<br>A\$ yr <sup>-1</sup> ha <sup>-1</sup> | CE<br>A\$ kgDIN <sup>-1</sup> | APVC<br>A\$ yr <sup>-1</sup> ha <sup>-1</sup> | CE<br>A\$ kg DIN <sup>-1</sup> | APVC<br>A\$ yr <sup>-1</sup> ha <sup>-1</sup> | CE<br>A\$ kgDIN <sup>-1</sup> |
| CW1                 | 11,269                                        | 30                            | 9,782                                         | 26                             | 8,953                                         | 24                            |

|     |        |       |        |     |        |     |
|-----|--------|-------|--------|-----|--------|-----|
| CW3 | 5,629  | 42    | 4,857  | 36  | 4,427  | 33  |
| CW4 | 12,915 | 52    | 11,405 | 46  | 10,564 | 42  |
| VD2 | 4,576  | 59    | 4,211  | 54  | 3,938  | 50  |
| CW7 | 9,997  | 114   | 8,755  | 99  | 8,063  | 92  |
| VD1 | 6,779  | 120   | 6,242  | 111 | 5,827  | 103 |
| CW6 | 8,928  | 217   | 7,836  | 190 | 7,227  | 175 |
| CW5 | 8,705  | 796   | 7,644  | 699 | 7,053  | 645 |
| CW2 | 57,665 | 1,093 | 49,701 | 942 | 45,263 | 858 |

Table S4. Cost-effectiveness analysis under varying discount rates and evaluation periods for sewage treatment plant wetlands (STPW) in subtropical Australia. Currency is in Australian Dollars (A\$)

| Treatment System ID | Discount rate: 3% per annum |       |          |       |          |       |
|---------------------|-----------------------------|-------|----------|-------|----------|-------|
|                     | 15 years                    |       | 20 years |       | 25 years |       |
|                     | APVC                        | CE    | APVC     | CE    | APVC     | CE    |
| STPW4               | 232,375                     | 116   | 187,604  | 93    | 161,127  | 80    |
| STPW2               | 99,269                      | 629   | 84,800   | 538   | 76,223   | 483   |
| STPW1               | 81,626                      | 1,028 | 66,640   | 839   | 57,777   | 728   |
| STPW3               | 205,158                     | 1,066 | 165,764  | 861   | 142,467  | 740   |
| Treatment System ID | Discount rate: 5% per annum |       |          |       |          |       |
|                     | 15 years                    |       | 20 years |       | 25 years |       |
|                     | APVC                        | CE    | APVC     | CE    | APVC     | CE    |
| STPW4               | 266,527                     | 133   | 222,976  | 111   | 197,845  | 99    |
| STPW2               | 108,029                     | 685   | 94,436   | 599   | 86,572   | 640   |
| STPW1               | 93,126                      | 1,173 | 78,552   | 990   | 70,142   | 907   |
| STPW3               | 235,224                     | 1,221 | 196,904  | 1023  | 174,792  | 908   |
| Treatment System ID | Discount rate: 7% per annum |       |          |       |          |       |
|                     | 15 years                    |       | 20 years |       | 25 years |       |
|                     | APVC                        | CE    | APVC     | CE    | APVC     | CE    |
| STPW4               | 303,050                     | 151   | 261,387  | 130   | 238,171  | 119   |
| STPW2               | 116,955                     | 741   | 104,390  | 662   | 97,371   | 617   |
| STPW1               | 105,416                     | 1,362 | 91,476   | 1,152 | 83,709   | 1,055 |
| STPW3               | 267,377                     | 1,389 | 230,718  | 1,198 | 210,290  | 1,092 |
